# Supplementary material for: Analysis of the TCP genes expressed in the inflorescence of the orchid Orchis italica
Source: PubMed Central journal article supplement (PMC4632031; doi:10.1038/srep16265), 2015-11-04
Supplement: srep16265-s1.pdf [file srep16265-s1.pdf]

**Analysis of the *TCP* genes expressed in the inflorescence of the orchid *Orchis italica***

Sofia De Paolo, Luciano Gaudio, Serena Aceto\*

Department of Biology, University of Naples Federico II, Napoli, Italy

\*Corresponding author: Serena Aceto, via Mezzocannone 8, 80134 Napoli, Italy, [serena.aceto@unina.it](mailto:serena.aceto@unina.it), +39

0812535190

Supplementary Figure S1

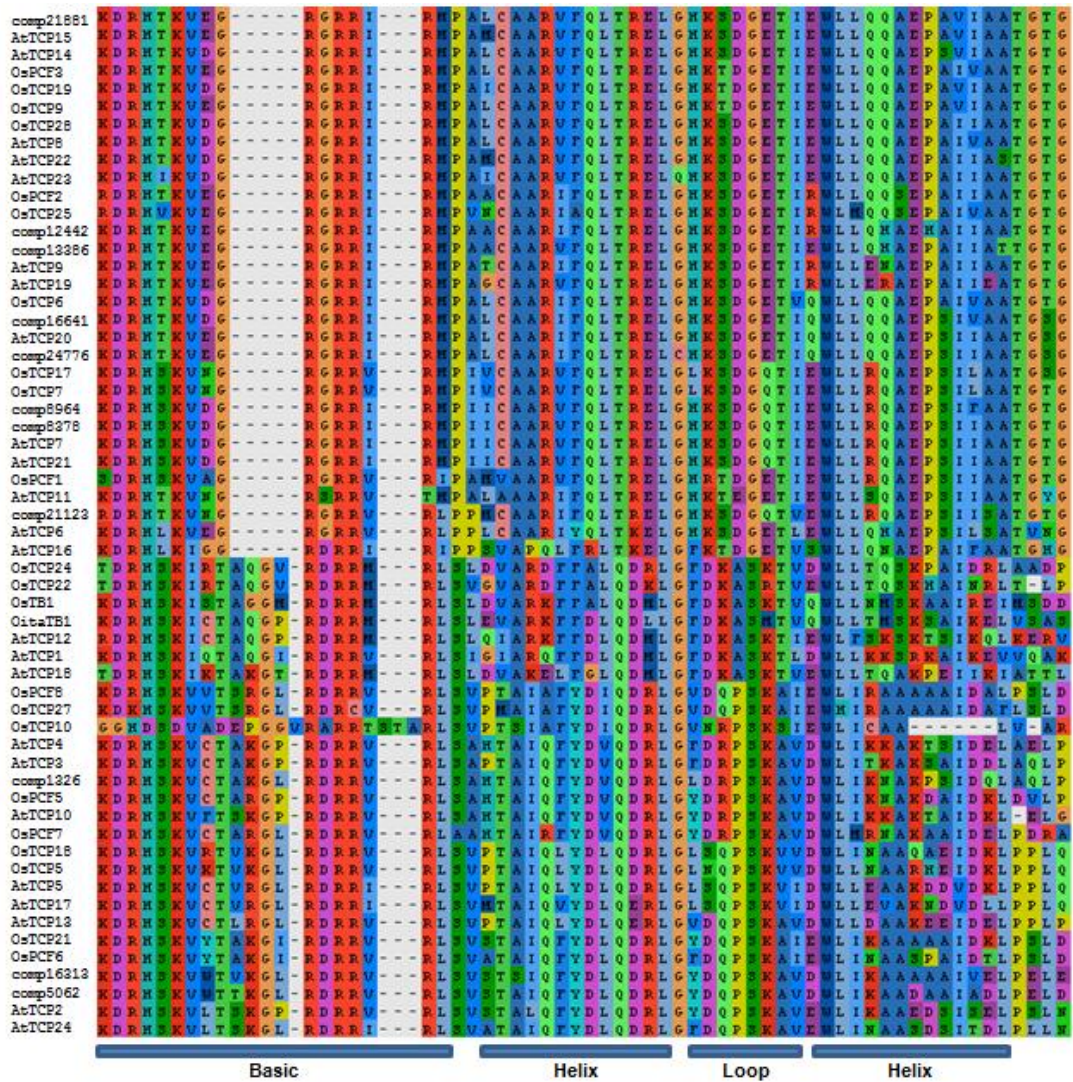

**Figure S1** Multiple amino acid alignment of the TCP domains of *Orchis italica*, *Arabidopsis thaliana* and *Oryza sativa*.

## Supplementary Figure S2

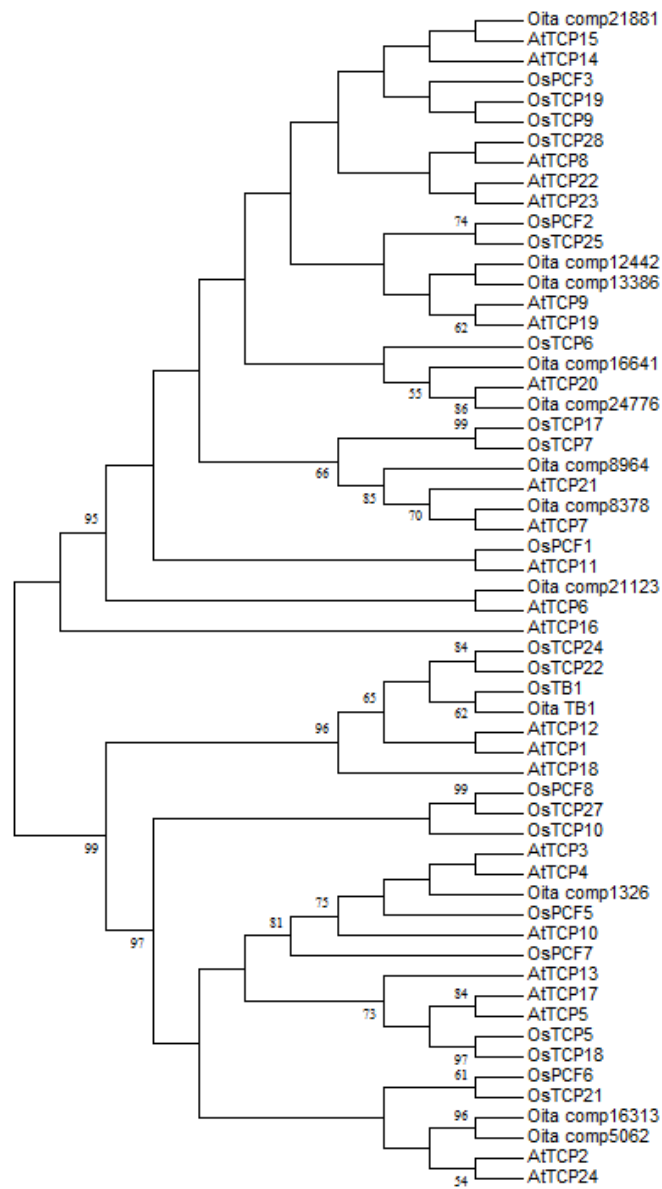

**Figure S2** The Minimum Evolution tree obtained from the amino acid alignment of the TCP domain of *Orchis italica*, *Arabidopsis thaliana* and *Oryza sativa* (Supplementary Table S1). The bootstrap percentages > 50% are shown next to the branches.

**Supplementary Figure S3**

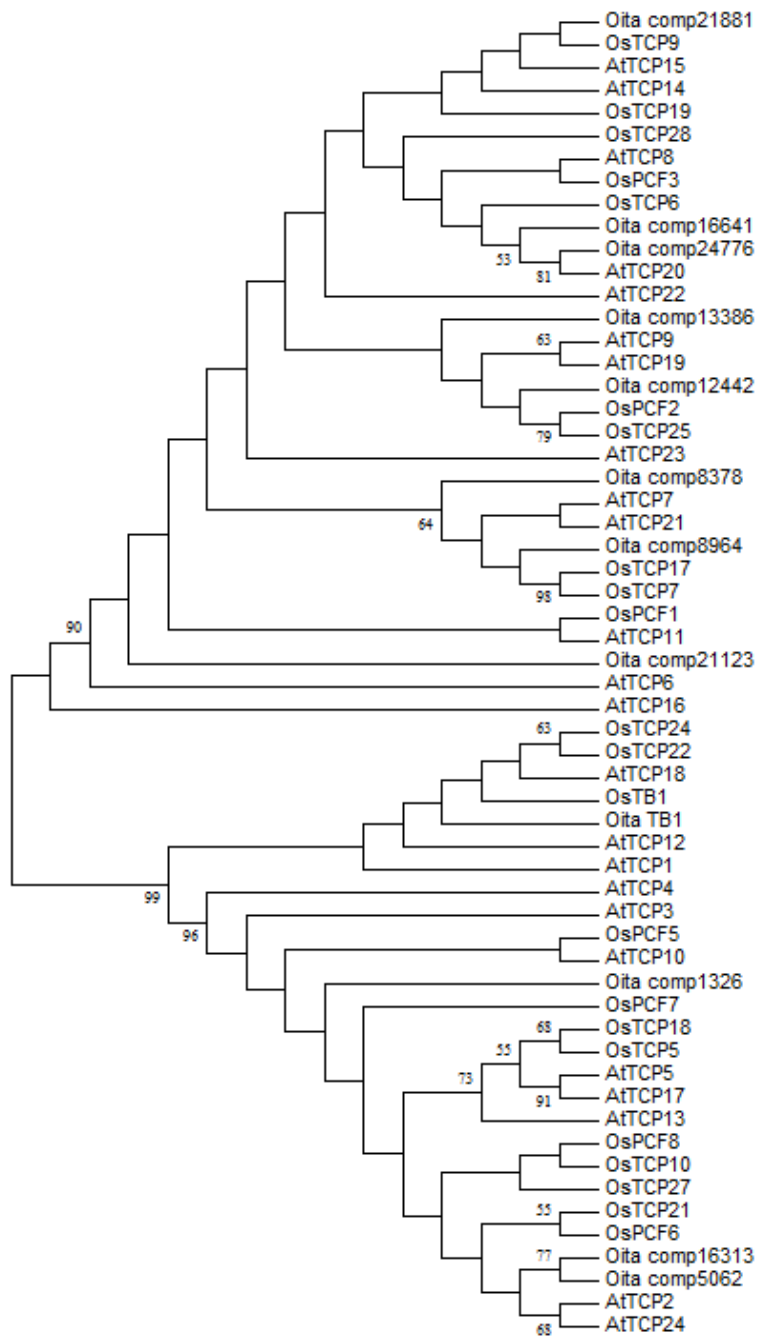

**Figure S3** The Maximum Likelihood tree obtained from the amino acid alignment of the TCP domain of *Orchis italica*, *Arabidopsis thaliana* and *Oryza sativa* (Supplementary Table S1). The bootstrap percentages > 50% are shown next to the branches.

Supplementary Figure S4

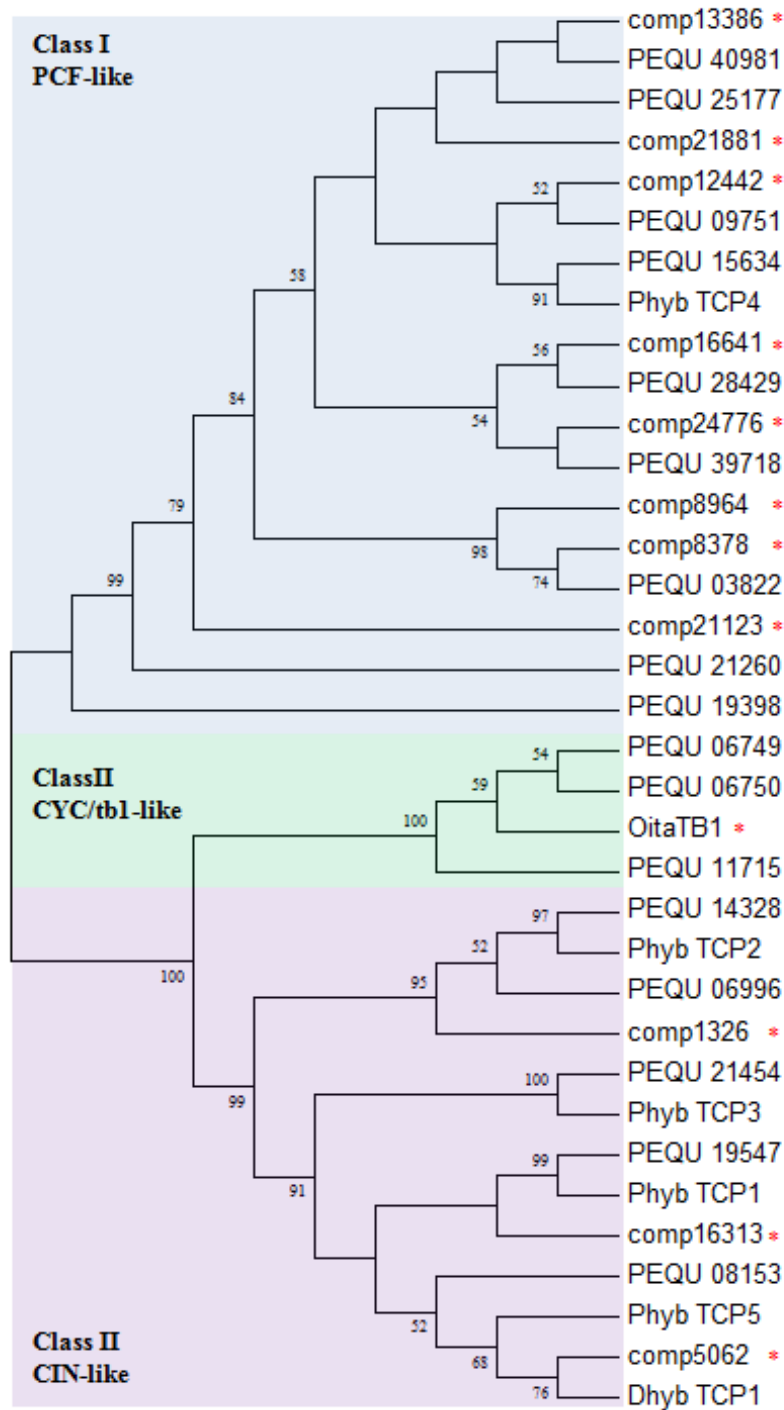

**Figure S4** The NJ tree obtained from the amino acid alignment of the TCP domains of the orchids *Orchis italica*, *Dendrobium hybrid cultivar*, *Phalaenopsis equestris* and *P. hybrid cultivar*. Numbers indicate the bootstrap values, shown only when > 50%. The red asterisks indicate the sequences identified in the present study.

Supplementary Figure S5

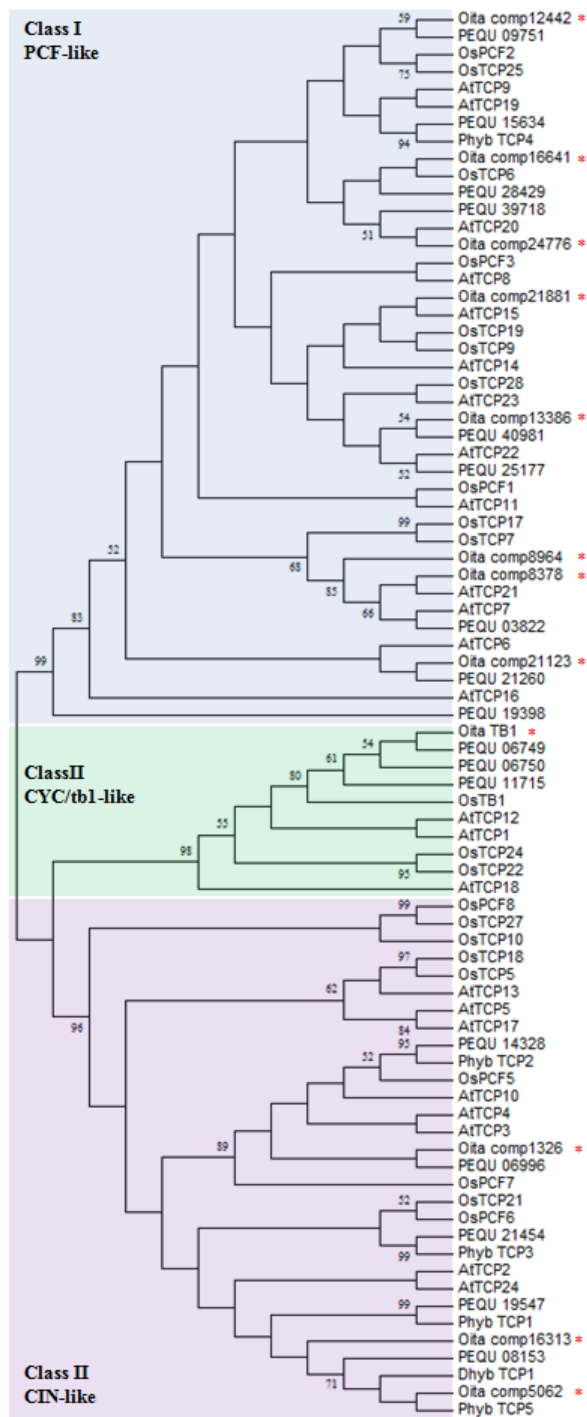

**Figure S5** The NJ tree obtained from the amino acid alignment of the TCP domains of *Orchis italica*, *Dendrobium hybrid cultivar*, *Phalaenopsis equestris*, *P. hybrid cultivar*, *Arabidopsis thaliana* and *Oryza sativa*. Numbers indicate the bootstrap values, shown only when > 50%. The red asterisks indicate the sequences identified in the present study.

## Supplementary Figure S6

|            |                                                                                                                                                                                                  |
|------------|--------------------------------------------------------------------------------------------------------------------------------------------------------------------------------------------------|
| ■ Motif 1  | [KR][KR]D[RS][HT][KS][DK][RV]HT[KA][VK][GED]GR[GD]RR[IV]R[ML][PS][AV]L[CT]A[AI][RQ][VFI][FY][QD]L[TQ][RD][ER]LG[HF][KD]S[DP][GS][EK][TA][IV][ED]WL[LI]QQA[EK]P[AS]I[ID]A[AL]TG[TL]GTIPA[NS][FA]S |
| ■ Motif 2  | RIVRV[S][RV][VT]FGGKDRHSKVCT[VS][KR]GLRDRR[VI]RLSVPTAI[QA][FL]YD[LI]QDRLG[LFV][DNS]QPSK[VA][IV][ED]WL[IL]NAAK[AD][AES]IDKLP                                                                      |
| ■ Motif 3  | LHHH[HQ]HQHQx                                                                                                                                                                                    |
| □ Motif 4  | GGGGGGGE                                                                                                                                                                                         |
| ■ Motif 5  | [KS]E[SL]R[AE]KARERA[RK]ERT[AKM][EKA][KE]                                                                                                                                                        |
| ■ Motif 6  | QQQQQQ                                                                                                                                                                                           |
| ■ Motif 7  | [ST]LN[IV]SLRSSGS[ST]LS[AS]                                                                                                                                                                      |
| ■ Motif 8  | S[FL]LP[PAH]S[IM][DG][SA]D[SAR][IV][AS]D[TS][IV]KS[FL]FP                                                                                                                                         |
| ■ Motif 9  | [FM][AF][SA][LIS][LH][GAS][GA][HAN][AGHV][AHNQ][QA][MI]PGLEL[GA]LSQ[DE]G[HNQ][IV]GVL[NA][PAS][QHY][SA][LF][SNT]Q[FI]Y[LHQ][QH][MV][GV]                                                           |
| ■ Motif 10 | [PAG][GA][AGT][FV]W[MA][VL]P[AV]                                                                                                                                                                 |
| ■ Motif 11 | [HN]L[GN][LIM]LA[AS]L[NS][AG][YAG]                                                                                                                                                               |
| ■ Motif 12 | AAAAAA                                                                                                                                                                                           |
| ■ Motif 13 | [FS][QN]RG[TP]LQS[NS][SN][PQS][PS]L[FHI]                                                                                                                                                         |
| ■ Motif 14 | [VQM][PSG]SG[LV]H[FL]MNF[PA]A[PT][MPI][AM][ALF][LF]                                                                                                                                              |
| ■ Motif 15 | [PAQ]MWA[VFI]AP[GN]                                                                                                                                                                              |
| ■ Motif 16 | [RKL][PR][NDT]F[PS]L[QE][LI][LY][EDG]KKE[EKLS]QQ[CD]                                                                                                                                             |
| ■ Motif 17 | IV[EA]VQGG[HG][IH][VI][RV]                                                                                                                                                                       |
| ■ Motif 18 | [SP]RI[IV]RVSR[A][SF]G                                                                                                                                                                           |
| ■ Motif 19 | [KD][SD][GTA][CE][SV]S[TA]SETSK[GS]S[VDT]                                                                                                                                                        |
| ■ Motif 20 | [HY][LTY][GF][NS][GNS][PD][NH][MI][GS][MN][GN][MV][MF][APT][YC][NT][PTV][ATV][NPS][TS]G[EH][HR]Q[DEM][IMV][FHQ][QP][FV]S[FIT]M[QT]DH[AV][IP][PS][ATV][SN][APY][PSV][GPT][IP][DGS][DGY][ND][LSY]N |

**Figure S6** The consensus sequence of the conserved motifs of the TCP proteins of *Orchis italica*, *Arabidopsis thaliana* and *Oryza sativa*.

**Supplementary Data S1** The nucleotide sequence (in fasta format) of the *TCP* transcripts present in the inflorescence transcriptome of *Orchis italica*.

```
>comp8378_c0_seq1 len=1464 path=[13110815:0-1463]
CGCCTCTGGGAGTAATTAATCCCAACTTGCTCTCTCTCTATCTCTTTTTTCTCTTTCATC
TCCCAGTCTCCCGTGTTCAGATTAGGGGTGATGACGACCGCGGCGGCGACGGAGGGAC
GGATAATGGAAGCGAGAACGGGAAGACGAAGGCGTTGGTGGTGAAGAAGACGCCGGCGAA
GGACAGACACAGCAAGGTCGACGGACGGGGAAGGCGGATCCGGATGCCGATCATCTGCGC
GGCAGCGTATTCCAGCTAACCCGTGAGCTTGGCCACAAGTCCGACGGGCAGACTATCGA
GTGGCTTCTACGCCAGGCCGAGCCATCCATTATCGCGGCGACGGGCACCGGCACAACCC
CGCATCCTTCTCCACCGCCTCCCTCTCCCTTCGTTCCGCCTCCTCCCCATCGACCACAG
GCCCGGGACCCACCTTCTCCCGCAGCCGCTGGTGCCTTCTACCGCTCCCTTCTTCCTCGG
AAAGCGGCTCCGCACTGAGGAAGAGTCCGACGCCGATGCCAAAGACGAGGAGGTTGGCGC
CGGTGTCATGACTTATTGCTGGGCTCCAGCGGCGGTTTTCTGGGCCGTTCCGGCCCCGGCC
GGACCTCGGACAGATGTGGAGCTTACGGCCCCGGAGATCTTCATGCAGCCGCCAGCTAT
CTCAGGACGGTTTGCCGCCGACGCGACCTTGTGGGGATTTCATCGGCGGCCAGGATGGG
GACGAACTATGTTCCAATATCACAGGGCCACCTCAACCTGCTAGCCGCTATGTCAGGCC
AGCTTCCATGGCCTCCACTAGGAGGGAAGACGATCCTCCAGCTGATTCCCGAAACCGTC
TTGATCAAAGTTAGAGTTCGTTATTTCCGATAACAGAGGCATCGTCTTCCCTCCTGTCCGA
TCTCTTATTCTCTCTAAGCCTGATTTGTTTCCACTGCTTTCATTCCTTACTTTTTTCATG
GCGTTAAATCTTCAAAGGTCGGAGATGAGGAGCATCAATTGGGGAAAACAGCAAGCTCT
CGCCGCAGTGTACCTCAGCTTGATGTTTCAAGATGACCAGGCGTCATCAGCCTCTGATCT
TGATGATTTGGGGAAACTCCGTTGTGAATTCAGACCGCAGGTTTTGTGCGCAATTTCTTTTA
CGATTTCTTCATGATGAATTAATGTTTAAATTTTAAAGAGTGATTGTTTGGGGGAAATCCA
TGGAGGTAGCTGTGCTGTTCCAATTACGTATTTCTTCTCTCCATTTCTGGGTTTCATCT
TTGATTTCTTCGAGCTGCCGGCGATGGGAATATTTGGGATTATGCATATAAATTCAGGATTA
TTCCTGCTGAAGCACGGCTTTTGTACTTGGCTGCAGTGTCTAAAAGTAATCATTTTATTA
ACATTTATTTAACTGTATTATTAAGGCTTTATTTAATACTTTTAATAAATTACTCTTAGTT
TTTAAATTTGTTTTTGTGTCCGGGC
>comp8964_c0_seq1 len=1214 path=[14025538:0-1213]
GGCGAAGGACAGACACAGCAAGGTGGACGGCCGTGGAAGAAGGATCCGGATGCCGATAAT
ATGCGCCGCGCGTGTGTCCAGCTCACGCGGGAGCTGGGCCATAAATCGGACGGTCAGAC
CATCGAGTGGCTCCTCCGACAGGCCGAGCCTTCCATCTTCGCCGCCACCGGAACAGGAAC
AACTCCGGCATCCTTCTTACCCTTCCACTTCCCTGCGCTCCTCCGCCTGCGCCCCGGT
GGAACACAAACCCGCTCCTCCGTAGCCCCCTTCCACGGGGCCCACCTTCTGCCGCAATC
CATGGCGCCGCGCCCTTCATACTCGGGAAGCGCATCCACTCCGAGGAAGACTCCGACGG
CGGCACTAAAGACAGCGGCTGTGGCGGGGCAGGCATAGCCTCCATGGCTCACACTTTAGG
TCCCGCCGGAGGTTTCTGGGCGGTTCCGGCGGACAGGACTTCGGCCAGCTCTGGAGCTT
CGGGGCGCCGGAGATCATCATGCCGTCGCCGGCAGTCTCCGGGAGGTACGCCACCGCCGC
GCAGCTGATGGGGGAGGCGTCGGCGGCTAGGGTTGGGAACCTACCTTCCCATCGCGCAGGG
CCACCTCAACCTCCTCGCTCTTTGTCCGGTTCGCTGCGGCGGCAGCCGCAGCGGCCGC
CGCCAGCAGGAGAAACGACGAGCACCCTGATACTTAGGCCCGGGATTTTATCTTGAT
CGATTTGCGCTGAAAAATTCGAAGTTGTGAACTCGGAAGACGTAATTAGTTTTTCTGCTG
CTTTTCTTCTCTATTAGATGTCTCTCACTCTTCTCAAACCTCTCCTCGCTTCTCCAT
GTTAGAACTGAAAATTCGGCAGCCGGAAGAAAATGTGGAGAAGATGAAGAAGAACATCAA
GATCATGAACTTTGGTTAATTTCTGCCGGGTAATTGCAGAGCTGGTCGTCGCTGGAATCG
ATTTCTGATGTTTGAAGCTGTAGATTTGGAGTTCAGGATTTCTAGGGATAAAACACATG
GTAATTAACCTGTAGATATGAGTTCGATCGCCATTGTTGACAGCTGTGGTGGTGGTGGCG
GTGCCGGCGGCGGTGGTTGCAAGAGAGTTTTATCGATTTATTAACCTGTAGTGTATTTGC
TGTGTTGGAGGCAATAATAGGCGATATGCATGTATTTCCGCATGTTTCGGGGTGAATTA
ATGGATGCAAGATC
>comp21881_c0_seq1 len=1796 path=[28475543:0-1795]
CACTCTTGCTCACTTCTGTCTCACTTTTCGCTTTCAAAAACACACACTTTCAGCATAACC
TGGTATTCTCTCTCCCTCTCAAGCTATCTACTTGCCTTCAAATCCCCCATTGCCATAAT
TAAATTTGAATTTGGGTTTGTAGTCCGATGGAATGACATATTCTCTCTCGTCTTCTCCTT
CCCTCTTCCCCATCTTCGCTCTTCTGCATCTCTTCCCATCTTCTCTTCTGTGAAGAA
TTGAGTGTTTCGTCATCCCGCCCTCAATATGTCATCATGCTTCTCTATAAAATCACCACA
```



TATGCCCATATAAAAACATATATACACGTGACTGTGTGTCTTCCTTTCTAGTTTTAGATA  
TTCATCTCCTTCCCTCATCGACCCCCGCTCTCTGTCTCCCGGGCTGTGATCGATATGTT  
CAAGTGTGGATTAGCTTTTAAAAAATTTAATATTTCTCCAGATTCTCATAACAGTCGAA  
GAAAATCAGTATCGAGATATTAATTTTTGTTATATATATAGTATTGAATCTTTCATAAA  
ATATCATGGCTTGAAGAACTGCGGCATGGAGGGAGAAGACAGAGGAGGAGCGCGGGT  
GCAGGCCAACTTCCCTCTCCAGCTTCTCGAAAAGAAGGAATCTTTTGAAGATCCGA  
GCTCGACATCGCTCGCCGCTACCCACCCTCGCCATCTCGTCTCCGCCCGGGGGCTG  
GTCTTAGAGACGACCACCACTCTCTGTTCCCGACGACAGCCACAAAAAGTCCAGCCGA  
AGCGCAGCTCCACGAAAGACCGTCTATACCAAGGTCGAAGGCCGAGGGCGCCGCATCCGAA  
TGCCGGCCCTCTGCGCCGCCGCTTTTCCAGCTCACCCGCGAGCTAGGTCACAAGTCCG  
ACGGCGAGACCATTTGAGTGGCTCCTCCAACAGGCCGAACCGGGCGGTCATCGCAGCCACC  
GCACCGGCACTATCCCTGCCAATTTACCTCCCTCAACATCTCCCTCCGCAGCTCAGGCT  
CCACGATCTCCGCTGGCCCGTCCCACCACCTCCGTTCCGCCGAGCAGCGCATTACTTCT  
CCTCCGCCGCCCCCGCTCCATGACGCCACTGCACCTACCATCCGCCCTTCGGTCCGACT  
GGGACGTTTTCTCCTTCCCTCAGCCCTTCTCTCCTCAACTTCCAAGACGTCAGCGAGGCGG  
ACGCGTCCGGCAACATCCGAAAGCGGCGTTGGGATCAGGAGCTTAGCCAGCAGCAGCAGC  
AGCAGGTGATGGCCAGCTACACAACGGCGACCTCACAAACGCAGATGCCGGCAACCATCT  
GGACTGCAGGAGGTGGAGCGGGCGGCGAGGCGGTGTGGCCGTTTGCTCAGATGGGCGGAG  
CGACCATGTTCCGAGGATCCATGTCCAGCGGTCTTCACTTTATGAATTTCCCTGCCACTC  
CCATGGCTCTGCTTCCCGGGCAGCAGATCGGTCTTAGCTCCGGCGGGCGGCGAGGGGCATT  
TGGGGATTCTTGACGCCCTTAACCTCGTACAGGCCAGCCGTTCCGGCTCAGGAACCGTCCG  
GTCATCATCAATATCATCATCAACAGCAGCATCACAGCAGCGGAGGGAGCGATAGGAATG  
ATACGATGAGCACGAGTGACTCTTAGCTTCGCGATTTCAAATGCAGTGTGCTACCTTCC  
TCCCAACTATTTTATAATTCCTTTCTATTCTCTTTTATATCTTTCTAGCTTAATTTGT  
TTTCCTTTTTTCAATTTTTATTTTCTACGTCTTGC GCGATTAGCTTAAAAAAAAA

>comp21123\_c0\_seq1 len=920 path=[27873465:0-919]

CCCACATCTTCTTCAAGCCCTAGATTTTTCGCTACATTTCCCGATCAGCGGCACCCGCCAC  
TGACTCCTCCCCTACCACCGCCGCGCAATCCTTCCCTTGTCTTTTTTCCCTCGAGAAACC  
CTCGCTATGCCCGGACCCACCTCGTCTCTTAATGCCCTCCCGATCGCCGCTCTCCGTCCG  
CCGTCGCCCGCAGCACTCGAACCTCACAATCCACAACCAGCCATGCCCTTCCAGATACTT  
CCGGAGGAAGATTATAGCTTACCAGCCCAGCGAGTCCGCGGGGGAAAGAAACGCTGCGGA  
AGCGAGACTAGAGGCGGCGCCACCTTGTCCGGCTCGTCCGAGGGACCGGCACACAAAGGTG  
AACGGGCGTGGGAGGAGATTCTGCTTCCCGCGATGTGCGCGGCACGGATCTTCCAGCTT  
ACGAGGGAACCTCGGCCATAAATCCGACGGGCAGACCGTTGAGTGGCTCCTCCGCCAGGCG  
GAACCCTCTATCATCTCCGCAACCGGAACCGGCATCGTCCCTCTCCCTGTCTCCAAGATC  
TCAGCCAGCCCATCGCCATCATCTCCCCCGCCCCTTCCACAAGCTTCTTCCAGTTCAGC  
GGGATAATGGACTACAGCGCCGCCTTGGGAGGATTTGGATTCCCCGCCGCCGCCGCGGTT  
GGCGAAGCCGTAGATGCCGGAATTGGATTCCGGCATGTGCCGTATTACACGGCCATGCTG  
TTGCATCCGGCATCCGCCGAGGAGGAGGACAGCCGATCCGCCGTCGCGCAACCGCAGGAA  
GATTAGCTGATTATTTTATTTTGAAGCAGCGATGGAATTTTTGGGAGGTTGCAACGC  
TGTC AATATCAGAAAAAGCAGCTTAAGGTATCGCGTTTTTCATATCACGTTCTAGTTATA  
TTACTATTTACCCGCAGAT

>comp16641\_c0\_seq1 len=1654 path=[23704865:0-1653]

AATGGCGAAGACTCGGGAGAGAGGGAGGAGGTTAGAAATTATAGTACAGTAAAAGTCAAT  
GTA AATGGAGGAGAGAGAGAGCAGTAGCAGCAGTTTCTGCAGTACCTGCTGTAGCTGCA  
GGCTGCAGCAGCATGCAGTTTACATCTTCCGGTCAAGATTCAAGGGATAAAACACAAGTC  
TCTTTCGCCCAATCACTGTTGCTTTCTTCCACCCTCTTTTTTTTTTTCTCTCTAAAATCCT  
TGTCAAATCCCAATCCTCGTGCCTTCCGCTCCTCCAGGCATCATCCATGGCTGCCG  
CCCCTTCTCTTTCCCTCGCTCTCTGAGACGCAATCGTCCCGAGAGGCAGAACC CGCC  
CCCGCTCATCTATTTCCGATGGATCCAAAGGTTCTGTCGAGCAGGACAAGGGCGAGAC  
ACGGAGAGAGCTGCAGATTGTGATTTTCAACTCGGAGAGGGAATTCCTCCCGTGGCCTC  
GTCCACGCCGGAGAAAGATGATCAGAAGAAGCAGCTTGTCTCCAAGAGAAGCTCCAACAA  
GGATCGGCACACCAAAGTCGACGGACGCGGCCGAGAATCCGTATGCCGGCGCTCTGCGC  
CGCCGAATCTTTCAGCTGACGCGGGAGCTCGGTACAAATCCGATGGTGAGACCATCCA  
GTGGCTCCTTTCAGCAGGCGGAGCCCTCCATCGTCTGCCACCGGGTCAGGCACCATCCC  
TGCTCAGCCCTCACTCCGCCCTCTTCCAACCTCCACCCTCCACCTCCGCCGGCCT  
CCACCCCAAGCTCAGCATCATCCTACCTCCGATCTGCCGAGCTTCCAGACCAATTG  
GGCGGCCGCCCTCTGGCTCCCCCGGTCCCAGTTTCGGCAGCCACGGATTCTCCCAT  
GACGAATCTCGCAGGGAACAGCGAAGGCCCTTCCGGAGGAGGTTTATGCAGAGAATTGG  
CCTGCCGGGGTTGGAGCTTCCACGGCCAACCTAGGGCAGATGAGCTTCGCCTCACTGTT

GGGCGGCCATGGTCAGCAGATCCCCGGCCTCGAACTGGCTCTCTCCCAGGACGGGCAAAT  
CGGGGTTCTAAACCCTTACGCGCTGAATCAGTTCTATCTGCATATGGGACAGGGAAGAGG  
GGCAGCAGGTGATGAACAATTACACCATCAACACCAGCAGCAGCAGCAACATAGCCA  
AGGATCTCTGAACAAAGATGATTCTGATGGGTGCTCAGTACTCAGTAGATGGAAAACCTCATTGA  
TGGATTATAGTGGGTGCTGTGATCTTCATATGTCTAGATAATGGAGGAGACTATGAGAAT  
AATCTGTTGGTAATGGTGTTCATTGAATCAGTCCATCCTCCTCATCAAGTAATCTCCC  
TTGTCATGGTTGATTTTTATATCTGGTAGATGATTGAATGGAAAGGATGTGTTCACTATT  
ACAATATTCTTCTTCTTCTCCATTTCATATTACCATATACATGTGAGCTTCCTAGAATGAT  
TTTGCTGCTTATCGTTTGTTCAGAGATTGTTTATTTGCACATTTTCATCAAAAGCCAGTT  
GTTAGTTCTTTGTTATTTGATATGAAGACGATTGATTACAAAGTGCAAATGTACATTTTT  
TG TAGTAGATTGGGCTAGATCGGAAGAGCGTCTGT

>comp13386\_c0\_seq1 len=1881 path=[20030337:0-1880]

GATAAACGTAAATGGCTGCTCTCCTGGGGATCGGCATCGCCATTAGGGCTTTGAAAGCTT  
GTCCGGCGGCATCAAGTCAATCACAAAATGGAAACAAGGATGGTGATTGAGACGAAGCT  
GTGGAGGAAAAGGCAAGTAGAGGGGTGAGTTTCTCTCTCTTTTCTCTCTCTCCCTCTCT  
CTCTCGCTCGGCTTCTGCTCAGCTGCCATGGCGATCTCATAGATCTATTTATCATATAT  
ATATATATTACCCTCATTACTTACGAGGCTCCACGAGTGGCCTACAGCCCCATACTGTTG  
CCGTCTTTCTCCAGCTATTCGGAAGACATGGCTCTGCCCGCCATGGCGCAACCATGAGAG  
AGAAAAGCTGCGAGATTATCGGGAATAGGTCTGAATTAAGAAATCCGGTAGACCTCCTC  
CTTCTCCGGCGGAATCGAGTTCTCAGAGTCAAAGCTTTTTCGTATTACTTGCCCAGCTCAC  
TCTGCGGAAGCGGAGAAAAGAGTCAACAGGAATAAGGCCGGAGCACGTGTTTCACGAAAC  
CCTAACCCCTTCTTCTCCACTCTGTTTTATGTTTATTTAATTTTCGTGAGCAATTTATT  
CCGAGGATTTTCATGTGGCTGGGAAGAAATAACGAGGACGAAATTTTGGGAAGAAATAGGA  
ATAAGATTGAGGGGTTTTCAGGATTTTTTTCCATTCCGATTTGTAAAGAATGGAGCATGCC  
GGTGGAAATAATGGAATCCACGCGCCGTCGCCGGATCCGGCGGCGACGGCAGCGCGATT  
GCTGGATCCGGGCACGTTGACTCATCACTTGCAATTTCAACAGCGAATCCGACACCGGCT  
CAGGATCCTAAGAAGACGGCGTTGGGGACGGCGAAGCGGTCTGTCGAAGGACCGGCACACG  
AAGTTGAGGGCCGTGGGAGGCGCATCCGCATGCCGGCTGCGTGTGCGGCGCGGGTATTC  
CAGCTCACCCGCGAGCTTGGGCATAAATCAGACGGGGAGACGATCGAGTGGCTGCTGCAG  
CATGCCGAGCCGGCCATCATCGCGACCACCGGAACCGGCACTATTCCCGCCAATTTCTCC  
TCTCTGAACGTCTCCCTCCGCAGCAGCAGTTCTTCCCCTCCGCGCCGCGTCCAAATCT  
GCCCCGCATTCCTTCCACGCTCTCGCCCACCACTACGAACTCGTTCGACCCCTCCTCCATG  
CTCGCCTTCCAGCCCGACGGCGCCCTGGGCCACGATTCGGCGCCCGACACTTACATGCGA  
AAACGGTTCAGAGGAGATCCTTTCAAAGAGGAGCAAGACGACGCCGGCTCCGGTGGCGCC  
AGCGGCGCCAGTCCGCTTCTCCGCCGAAATCCGGGTCCCGTCCCGTCCCTCCCGCTGCC  
GCGATGTGGGCCGTGGCTCCTGGGAGCAGCGCAGGGCCTGGGGCGTTCTGGATGTTACCC  
GTGTCGGCGGGATCTTCCACCCCTGCCCGGAGACTTCTTCACTGTGGACGTTCCCGGCG  
GCGCCAGGCGCGAACACTTTCAGAGCCGGCGCCCTTGCAGTTTATGTGAGGATCAACATC  
CCAGGGGTGGAGTTTCAGAGCGGCCGAGGCGTCAGCGGGATGCCGATGGGGTCCGATGTTT  
CCGGCGGCCAGCATCTGGGGCTAGGGATTGCTGATTGCAACCTTGAATGCTGGGTGCT  
ATTAATGCTTATAATCGTAGTGGCGGCGGCGCAGCGGTGAGATGATGAATCCGATCAT  
GGTCCGGCGATGGATAGGCGCCGGCAGCAGCAAGGTTTCGAAAGTGGAGGCGGAGAT  
CGCCTAGCAACTCTCAGTAGAGGGAGATCAAATGGTAAGTGGGAAGATTAATTTCCCGCT  
GCAACTGCATACTAGCACTGC

>comp24776\_c0\_seq1 len=1251 path=[30640444:0-1250]

CAGGGGTGTGCATCTTCATCCGCTCTCTCCAAGCCTTCTTCAACTCCCAGAGTCCCACC  
CATCCCTCTTATTTCTCCACGATGGATTCCAAGGCTTCTCCAAGCTCCCGCACGAGAG  
CCAAGATGAGGTGGAGCCCAAAGAGACATTCGAGAGCTCCGGATGGTGATTTCCGCCCC  
AGTTTCAGGAGCAGACATAGATTCGACTTTTGTAGTTGAGAAAGATGATCAACGGAAGCA  
TCTTGCACCCAATAGAAGCTCAAACAAGACCGGCACACCAAGGTTGAAGGCCGTGGCCG  
GAGGATACGGATGCCGGCTCTCTGCGCCGCCCGGATCTTCCAGCTTACCCGCGAGCTATG  
CCACAAATCTGACGGTGAGACTATCCAGTGGCTTCTGCAACAGGCTGAACCTCAATTAT  
CGCTGCCACGGGATCCGGCACCATCCAGCCTCGGCCCTAGCAGCCGCTGCTGTGCTAT  
CCCCTCTTCTATCCCCACCCCTCAATTTCCCGCCGGCCTCCACCCGAGGCTTAACAACCT  
GCCAGCAGCCTCGTCCGCTCGGCCAATTTGGGCTGCTGGTCTCTGGCAGCCGCCGCTCAC  
TAGCTTTGGGCTCACAGGATTTGGAGCTTCTGGGGCAAATTTGGGTCAGATGAGCTTTGC  
ATCATTGCTAAGTGGGCATGTACATCAGATGCCGTTGGGCTCGAGCTAGGACTTTCACAAGA  
TGGACACATTGGGGTTTTGAACTCTCATTCTTTGAGCCAGTTCTATTTGCAGATGGGTCA  
GGGAAGAGCGGGAGGAAGTGTGAGCACTTGCAGCATCACCATCAACAGCACCAAAGCCA  
GCGGGACAAGGATGATTCCGATTGCTCGAGTTAGCAAATATTTATTTGTTGACTGAATT

TCTACCATGATATTTGGGGTGAAGATGGAGGATGGCATTAAAGGTATCATATTGATCAG  
AGGTACTTCTCCTTCTCTGGCCAATAGGCTTGCAATTCTCCGGATCGAGGAAGACGAGGG  
GTTCTCATAAGGCTACGAAGAAGGCAAAAAAGTTCAAGAAACAAAAGCAAAAAGTTGGCAG  
AGGAAATAGCTAAGGTATGAGTTAAAATATTTATTGGAATAGAGGAAACGGTAAAGAGAC  
AAAGAAAAATATGAGAATTGGCAGTGTTTAGTCTGTAATCAAATAGATTGGATAGTTTTG  
AGTCTGTAGTGTGTTGTAGTTTGTCTGAGTGTGTAATCAAATAGATTGGATAGTTTTG

>comp12442\_c0\_seq1 len=850 path=[18888421:0-849]  
CGACGCTCTTCCGATCTATTCCCTTTTTACTCCGTAAGCAGGGAGGAAGGAGCGAAAAAG  
GTTTTCAACACCATGGAAGACGACATCAGAAGCACGACCGCCGAAGGCGGAGAGACGGCA  
GCTCGCCTCCGGCAAATAGTCCCGAAACTGGAGCCGACGGATATAATCGGAGCGACGCTT  
CCGATCATCAGGATGCCCTCAAGGCGCACCAAGGACCGGCATACGAAGGTAGAAGGAAGA  
GGACGACGGATTCCGGATGCCGGCAGCCTGCGCGGCGAGGATCTTCCAGCTCACCCGCGAG  
CTCGGTCATAAATCTGACGGCGAGACCATCCGGTGGCTGCTTCAGCACGCGGAGCACGCC  
ATCATAGCCGCGACTGGGACCGGAACTATACTGCCATCGCCACCAACGTCAACGGAACT  
CTCAAGATCCCCACGGAATCCCAGTCCGGCCGGGACATCGGGGGTGGATGACGCTGCCGGA  
AAGAGGAGGAGGAAGTTGCAGCCTACGCGAGGTTCCGATCATCCACTTCTCCAGGTTAGC  
GGTTCGGTTTTCGGTTCCAGCGGGTCTGGCTCCGATAGCGCCGATGTGGGCCATCGCCGGA  
GGCACTGCAGGGATTACCGGTGCGTTAGTGCCTCCGGGGGCGGTATGGGTGGTGGCCCCCT  
GGTCATATGTGGGGGTTTTCGGGCCGTGAGCATGTTGAACGGCGGCAGGCGCGGGGGTTCT  
CCGGAGGTTGATAACCGGGAAGCAGGAGCTGCAGTTAATGAGGGAGACAGCGGAGGTAGCA  
CGGCCGAGGAGGGAGACGAAGAAGATCAGCAACC CGCGGAAGCAGTGGTGGGGACAGAT  
CGGAAGAGCA

>comp16313\_c0\_seq1 len=1507 path=[23350909:0-1506]  
TCTTTTTCTTCTCGGAGAAGAGGATAATTAAGAGATTGGTGCGGGGAGAGGGGGCATGA  
GAGCAGAATGGAGGTGGAGGGGATCCACTCGAGCAAGCGGTCCAGGAGGGATGAGAACGT  
GCCCCAAGCAGACGTGAAAGGCGTGCATGAACTCGTCTCATGGCAGAATGCATCTTCAAG  
AATTATTAGGGTTTTCGCGAATTTCCGGAGGTAAGGACCGCCACAGCAAGGTGTGGACGGT  
GAAGGGGCTCCGAGACCGCCGCGTGCCTCTCTGTCTCCACTTCCATCCAGTTCTACGA  
CCTACAAGACCGCTCGGGTACGACCAGCCAGCAAGGCCGTGGACTGGCTCATCAAGGC  
GGCCGCCCGCCCATCGTCAACTCCCGGAGCTCGAAGGCCCATTTCCCGTCCCGCCGTT  
CTTGGCACTTCTGGTTCGCGCCATTCTCTCCAGAGATCTCTGGCCGGCGAGCAGCAGCT  
GTCTCAGTCCAAATCGACCTGCAGCAGTGCCTCGGAGACCAGTAAGAGCTCGGTGCTGTC  
TCTCTCCAGGTTGAGAGTCTCTTCAACGAGAAGAATAAGGACCCTCAAAACCAGAACAA  
GGAGAGCTCCTTCAGTGACCAGCTCACTGGCAGCGGCAACATCAGTGGTGGTACTCCGGC  
AGCTGCAGTGGTGGATTTTGGCAGCAGTCTTATCCGAGGCAGCTGAGGACGCTACCCCC  
AAGTTCTACATCAGAGTACTTCAGGGAAGCTGGAAATTTTGGACATGGGAATCGAATTC  
CCAGCTTGAAACTAGTTTCTCTTCAATTTTTGCATTATGGAAGCAGCCCTAATATGGGGAT  
GGGGATGATGACATACAATCCAATCCTTCCAGGAGAGCATCAGGACATACATCAGTTTTCT  
CATCATGCAAGACCATGCAATTCCTGCATCACCTGTGCCACCTGGGGGAAATTTCTAACCT  
TAATGTCTCCGTTTTCTTCCGGCATTGCCAGATTTGCTGGGGGGTCCCTTCAGTCCAATTC  
ACCTCATCTACACCATCTTATGCATGGTGCAAACTTGCCCTTCTTCCCTTAGCAGCACTAT  
TCCAGTTGCAGCAGCAGCGGGAAGCTCGCTGGAGAACCAGTTCCTGGTGGTTTTCAATGG  
CCATCTGCAGCTGTTCTGTAATGAGGCATACATGCAGCCGGAATTGAAGGAGGAAAGGAA  
GGTTGAAGCCTGTAATCTGCCGGATCCTACAGTTTTTTCGTGGTCTGCCCTGGCGTGATG  
TAGACGCCGAAGACAATCGCCCGGCGGATTATCTTCAGTTTTCTGATGAGGCCCTCAAATG  
CTATCAGTTTTATCCTCTTTTAACTTGTTTTCCATGAACTATGTGTGAGCCCAGTGCTCAGG  
ATTCTTGCCCTGTTATTTGGTTTTATGTAATAATCCCTAAGCTATCTATTTTGGTTTTTCATA  
TGCTGAGGAGAAAAAGTTACTTTTTCTTCTGCCTAGTGATATGGAAAAAATTTGAACCT  
TCAGCTC

>comp5062\_c0\_seq1 len=2394 path=[7899858:0-2393]  
AAATCCCCGATCTGTACGTCTGTAGGTTAGCACTCCCATCACCTAGGATATAGGGTAGT  
AGGGCTATTCTTGTGCGACTAGTAGATGACAAATTCGATAATTTGATGAATTTCAAGGG  
TACTTCTGCGGTAACCTTTTTGAACTATAAAGCCCAAGGCGGCGCACGGCGCAAACGGCG  
CAATCCCCGGTGAGATCGTCTGTTTTCTGCGCGGAACAGCGCTTCGATTGATCGAATCCC  
GAGCTCTACTCTCCGCTTCTACTTTATCGGGTTCTGCCCTTCTTTTTTGTAGCCGGAG  
AAATCCAGTTCTGGTCATGGTAGGTACAACGGAGGTCGGAGATAAAGCAGGAGAGTTGAT  
CGAAGTTAAAGTCAATTTCTTCTATATAAGTTTTGGATTAGAAACCAGAAGAAATGCTCCC  
ATTTCTGTGCTCTCCGAAACCCTAAATCTCAGATCCGAGCAACGAAGGCTCTCTCTCAC  
TTTTTCTGAGCTTCTTTTCTGCTCTCGGCCTTATCCTGAAATAAATCCTTGCCGCTTTTTTC  
TCTCGAAATTGTGCCATCTTTGTACATAGAGCAGTCTGATGGTGGAGGGCAGGCGATCG

CAGTTCGCTGGCGAGCGATCAGCGAGAGAGATGCTGCGTCGCAGGGCGCCGGCCAGCAAC  
CCAGGCGGCCTGAGGATGACGCCGCTGGTAAAAGCGGCTCGTCGCTGACACATCTCGGCC  
ACCACCCTATTTCCAGCGTCAAACGAGCTATTCTTTTTCTCACCTTCCCTCGAAAGCCTC  
ATCAATGCAAAAGGACACGGTGAAGTTGAATCCCTAAACGCTACCACTCACGCCCCATT  
TCTCCATATAAGGAAGCAGGAGAAAGTTAAAAGCCAAAAGGCCAAGTTCTTATTTAGTA  
GGGGATAAGAGCGGGATATCGAGTGTAAAACCTTGGTTATCGGGGGAGCAGGGAGGGGCA  
TGAGTGAGGGATGGAGGCGGAAGGGATCCACTCGATCAAGCGGCTTAGGAGAGACAAAGA  
CGAGGAAAACGGGGACGTGAAGAGCGTCGCCGGTCTCCGACCGTGGCAGAACGCCTCGTC  
GAGGATTATCAGGGTTTCCCGCTTTCCGGCGGGAAGGACCGCCACAGTAAGGTGTGGAC  
GACGAAGGGACTCCGAGACCGCCGCTACGTCTCTGTTTCCACCGCCATCCAGTTCTA  
CGACCTCCAGGACCGCCTTGGCTACGACCAGCCAGTAAAGCGGTAGACTGGCTCATCAA  
GGCTGCCGACGCTGCCATCGCCGATCTGCCCGAGCTTGATGGCGCATTTCCCATGCCACC  
CACTATGGTTCTTCCCATTTCGAGCAAATCTGCATGAGCGAGCAGCCGCCGGCGAACAGAA  
AATCTCCCCGTCCAAAATCCACGTGCAGCAGCGCGTCCGAGACAAGTAAGGGATCTACACT  
ATCCCTTTCCAGGTACCAGGCGAGGGAGCGTGTCTCGGCATAGGACGGCAAAAAGAGAAGGA  
GAACGATCAAGACGCATCCCATCATCAAAATCTCATCACGCACAGCTCCTTCACTGAAC  
TCTCAATGCAGGCCCGACCGTTGAAGGGGCGAGATTGCGGCACTGATTTTGGTCAAAAACA  
TCTCAGGCCTCAGCTGTCATCTCCAACCGCCGATTACGTTGGTCACTGTTGGGATGTTTGG  
GCAGACACATAGAATTCACATTTGTTACCGGGTATTCTACTCCCCTGATGCATCTAGG  
GAACAATCCTCACATGGGAATGGGGATGATGGCATAACAATACTGCTTCGACCGGAGAACA  
TCAGGAAATGCAGCAGTTTTCTTTCATGCAGGATCATGTAATTCCTGTGCAGTCCAGG  
GATTGACTATGATCTAAACGTCTCCATTTCTTCTGTTTTTAGTGGATTTAATAGGGGGAC  
CCTTCAGTCCAATTCATCTCATCACCACCACCTTGTTGATGGCCAAAATTTGCCCTTCTT  
CTTTGGCACTGCTCTTCCAATTGCAGCAGAGGGAGCCTCCTCAGAGGGCCAGTTCATGG  
CGTTTTCAATGGCCGCTGTCAGGTTTGCTGCAACGAAACACACAGACACCCCAAGCTTAA  
GGGGGAAGGGAAGGGTTGAAGTCTGCGTGGATCTATCTGATGTTTCTGTTCACTGGATCT  
GAAGACATAGAAGCAGAGTGATACTCAACCTTGGGCGCTTGGGTTTTAGTGTGAAGCCT  
GTCTTTCTGCTTCATCAGCTGAGTAATTGTTTTAATCTACTTTTTATGCAATTGTGATTG  
TACTGGTGTTTGGTTTTGTGATCTGATAAGCTAAAATTTTTATTTTATCTCCAAGTATAC  
ATTTCTTTACTATCAAAGCCTGAATGATGATATTTGCAATTTTTGGCCCCAGAT  
>comp1326\_c0\_seq1 len=2788 path=[1822481:0-2787]  
GGGGGCGGC<sup>^</sup>GATCATCTCCTTCCCATAACGGGGGCACATGGTTAATAACGCCGTCGGAG  
GGCGGTCCCGCCATTGTTTTTGCCAGGTAAGGAGTAGAACCCACCCACCTGTCGCGTAG  
CCCTCTTTAGGCCTACCGAGCCAAGGACACACATCTGTAGCGTGTGTCGGGCACAACCT  
CTCATTCTCTCTCTCACTGCGGGAAGCCATTACTGCTCTTCCCTCCTCCTCCGAACGA  
GTTCAAACCTTCCACTGAATGGAAGCAGTAAAAAATAAAAAATAAAAAACAGAGTCTGGGCT  
CGAGCAGTAATTTGGAGAGGGAGGGGTGCTCATTACTCCCTCGTCATCCACATAGAAAGC  
AGCGGTGAAATATCCTAAGAGCTGAAAGGAGTGCCTCTCACAACCTCAAAAAGACATTGTT  
AGAGAGGAGAGGGAATAGAGATAGAAAGAGAAAGGGGGGTACAAACGCAGTAAGTAGCTT  
TTGCGAGCAAGTAGAGAGGATCTAGCCGTTATGCGCCTAGCTTAGAGAGAGAGAGAGACA  
GGGTTTTGCACTTTCCTGCCATTGTGCGGCCCTCCATTATTATCTCCAAAACAGAGTTTT  
GTGCCGGGAAGTGAGAGAAGTTGATTGTAGGCTGTCTGCTTAGTGCGTCTTTGTTGGGAG  
ATGGGATGAATTAGCCTCATCTTTAATCAATGACGCCGTGTGACGCCGCTCCTTCCCCTACT  
CTTGTCTTCTTCCCTCCTCCCCCTTCCAGCTAATATGTGATGACTTTTGCCTGCTTTT  
TCTGCCTTAACAGTATCAAAAATGGGATCCTGATTCGTCATCTGTCTTGTGATGGAGCGG  
TTGGATGGGCATGGTTTGTCCAAGCGCCACAACCTGGTCTTTGCCGGAGCAAGAAGAAAGA  
GAGAAAGCACCGTTCTTTAAGAGCGGGGAGCAGCGGAAAGGGAAAAGTAGTGGAGGAGA  
AGGAGGGGAAGAACGAGAGTCTGGATCCCAGGAGGAGTTGGCCAGACCAAAGCGAAG  
GAGATCGAGGGAGAGACGGAGAGAAGTTTACCATCACCCGCTGCATCCGTAATCCCCTGCG  
CTTCTTCTTCCCTCCGATTATGCGCGGTTGTGCGGAGAGCATGGTGGACACGCAGCGCGGC  
CGCGCGGATGAGGGGCGCCGGAGGGGAGATTGTTGAAGTCCAGGGCGCGGCCACATTG  
TGCGGGCTACGGGGCGAAAGGACCGACACAGCAAGGTATGCACCGCCAAAGGACTAAGAG  
ACCGTCGCGTGCCTCTTCCGCCACACCGCTATCCAGTTCTATGACGTGCAAGATCGCC  
TTGGCCTCGACCGGCCGAGCAAGGCCGTCGACTGGTTGATTAAGAACGCCAAGCCCTCCA  
TCGACCAGCTTGCCAGTCCCTCCATGGCGTCCCTCCAGATCCCTCTCCGCCACACGCGT  
CCGCCGGAGACCACGAGGGACAGAAACATCACGTTTCTACTGATATCGGTGACTACGGTG  
CTTCTGCTTACGGATATTGCGGTAGTTGAGCTTGCTCCCTCCTTCGCTCGACTCCGATT  
CAATCGCCGACACCATTAATCATTCTTCCCAGGACCGCCGCGCTACCGCCTCTGCAT  
CCCCCTCTTATCCCTCGGCCCTGACCTTCTCTCCCATGGTGGTGGTGGAAAGTAGAAGCC  
ACGCGGAGGACCTCCGCCTCTCACTCCAGTCCCTTCCAGGATCCAATATTTAGTCATCAAC

AGAATCGGGCAGCTCCCGCCCACCAATCCCTTTTTTCCGCTCCCATGAGTTTCGATGCCG  
CCGCCGCCTCCACTTGCCCGGAGCCAGGCCAGCGAGCGGCAGCGTGGAATCTTGCCGAAC  
CCTCCTCCGCCGAGGCCGGCGGCAGCGGAGGCAGGTACTTGTTTTGGCTTATCATCACAAC  
TGGTCCAGAACCAGTTTGTACACAGTGGGGTACCCTTCAGTCCAGTAACCCGCCTTTGA  
TTCGTGCCATGGCGGACCCAATCGCTTTATCTTCCGCAGCCGGTCACCAGATGCACCTAA  
CAGCTTTTTCGGTTCGAGCTTAACCTTGCCGGTGCAGCCTACCAAACGCCCGCGCGATG  
TGGTTGGCTTCTCTGGGTACCATATGCCAGCACGAATACATGGCGGGGAGGAGCACGATG  
GCGCCGTCGGCGACGCGCCTCCCTCTGCCTCCTCTGCTTTGCACCGCTGATGGAAAGTAG  
TGAGAAGAGGATCTGAAATAGCTTCAAACGTCTCGTCATCAGATTTTGTCTGGATTCTT  
CGCCGGGCGAAAAGGATCTGCAACTCCGGCAGGCAAACAGTTCCCTCTGTCTCTCTTTC  
CCTTCGGTGTTTTATCTTCTTGTGGGGCTCTCTACAAGCCCTGTATCCGCATTTCTTAAT  
TATGTTTTTCGCTGTTAACGTTTGATTTATCGTATGTTATTACCGCTGTGCTCCTCTCTCA  
TGTCTCTGTTTCTCCCTTCTTCCATTCCAAAGACTTGAACCTAAATTTATATATTGTT  
AAAGATTGTTTTTTTTGCTGGTTTTGTTGGTTGGTCTGTGGAAGGGGAGAAAATGAGGAAATT  
GGAGAAGAAGGATCGATGTATTAGTGGCTGGACACGGACATGAATGAAGCCATGCGTCAC  
TTTCATGATGACAGTGAGAAAGCGAGCAGAGCGCCTTGCTGTATAATTGGAAAGAGACTT  
GTCCTTTTCCCTTCTTTTGTGACTCTTTTGTTCATTTTTCGAATGGAAAATGGAGATCTG  
GGAGATGAAGACGTGGTTTTTCTGAAAAA

**Supplementary Table S1** The sequence identifier, name or annotation and type of the TCP proteins of *Arabidopsis thaliana*, *Dendrobium hybrid cultivar*, *Oryza sativa*, *Phalaenopsis equestris* and *P. hybrid cultivar* examined.

| Species                     | Identifier | Name or annotation | Type    |
|-----------------------------|------------|--------------------|---------|
| <i>Arabidopsis thaliana</i> | At1g67260  | AtTCP1             | CYC/TB1 |
| <i>Arabidopsis thaliana</i> | At4g18390  | AtTCP2             | CIN     |
| <i>Arabidopsis thaliana</i> | At1g53230  | AtTCP3             | CIN     |
| <i>Arabidopsis thaliana</i> | At3g15030  | AtTCP4             | CIN     |
| <i>Arabidopsis thaliana</i> | At5g60970  | AtTCP5             | CIN     |
| <i>Arabidopsis thaliana</i> | At5g41030  | AtTCP6             | PCF     |
| <i>Arabidopsis thaliana</i> | At5g23280  | AtTCP7             | PCF     |
| <i>Arabidopsis thaliana</i> | At1g58100  | AtTCP8             | PCF     |
| <i>Arabidopsis thaliana</i> | At2g45680  | AtTCP9             | PCF     |
| <i>Arabidopsis thaliana</i> | At2g31070  | AtTCP10            | CIN     |
| <i>Arabidopsis thaliana</i> | At2g37000  | AtTCP11            | PCF     |
| <i>Arabidopsis thaliana</i> | At1g68800  | AtTCP12            | CYC/TB1 |
| <i>Arabidopsis thaliana</i> | At3g02150  | AtTCP13            | CIN     |
| <i>Arabidopsis thaliana</i> | At3g47620  | AtTCP14            | PCF     |
| <i>Arabidopsis thaliana</i> | At1g69690  | AtTCP15            | PCF     |
| <i>Arabidopsis thaliana</i> | At3g45150  | AtTCP16            | PCF     |
| <i>Arabidopsis thaliana</i> | At5g08070  | AtTCP17            | CIN     |
| <i>Arabidopsis thaliana</i> | At3g18550  | AtTCP18            | CYC/TB1 |
| <i>Arabidopsis thaliana</i> | At5g51910  | AtTCP19            | PCF     |
| <i>Arabidopsis thaliana</i> | At3g27010  | AtTCP20            | PCF     |
| <i>Arabidopsis thaliana</i> | At5g08330  | AtTCP21            | PCF     |
| <i>Arabidopsis thaliana</i> | At1g72010  | AtTCP22            | PCF     |
| <i>Arabidopsis thaliana</i> | At1g35560  | AtTCP23            | PCF     |
| <i>Arabidopsis thaliana</i> | At1g30210  | AtTCP24            | CIN     |
| <i>Oryza sativa</i>         | Os04g11830 | OsPCF1             | PCF     |
| <i>Oryza sativa</i>         | Os08g43160 | OsPCF2             | PCF     |
| <i>Oryza sativa</i>         | Os11g07460 | OsPCF3             | PCF     |
| <i>Oryza sativa</i>         | Os01g11550 | OsPCF5             | CIN     |
| <i>Oryza sativa</i>         | Os03g57190 | OsPCF6             | CIN     |
| <i>Oryza sativa</i>         | Os01g55100 | OsPCF7             | CIN     |
| <i>Oryza sativa</i>         | Os12g42190 | OsPCF8             | CIN     |
| <i>Oryza sativa</i>         | Os03g49880 | OsTB1              | CYC/TB1 |
| <i>Oryza sativa</i>         | Os01g55750 | OsTCP5             | CIN     |
| <i>Oryza sativa</i>         | Os01g69980 | OsTCP6             | PCF     |
| <i>Oryza sativa</i>         | Os02g42380 | OsTCP7             | PCF     |
| <i>Oryza sativa</i>         | Os02g51280 | OsTCP9             | PCF     |

|                                     |            |                                                                                        |         |
|-------------------------------------|------------|----------------------------------------------------------------------------------------|---------|
| <i>Oryza sativa</i>                 | Os02g51310 | OsTCP10                                                                                | CIN     |
| <i>Oryza sativa</i>                 | Os04g44440 | OsTCP17                                                                                | PCF     |
| <i>Oryza sativa</i>                 | Os05g43760 | OsTCP18                                                                                | CIN     |
| <i>Oryza sativa</i>                 | Os06g12230 | OsTCP19                                                                                | PCF     |
| <i>Oryza sativa</i>                 | Os07g05720 | OsTCP21                                                                                | CIN     |
| <i>Oryza sativa</i>                 | Os08g33530 | OsTCP22                                                                                | CYC/TB1 |
| <i>Oryza sativa</i>                 | Os09g24480 | OsTCP24                                                                                | CYC/TB1 |
| <i>Oryza sativa</i>                 | Os09g34950 | OsTCP25                                                                                | PCF     |
| <i>Oryza sativa</i>                 | Os12g02090 | OsTCP27                                                                                | CIN     |
| <i>Oryza sativa</i>                 | Os12g07480 | OsTCP28                                                                                | PCF     |
| <i>Dendrobium hybrid cultivar</i>   | DQ517495   | Dhyb_TCP1                                                                              | CIN     |
| <i>Phalaenopsis hybrid cultivar</i> | HQ439603   | Phyb_TCP1                                                                              | CIN     |
| <i>Phalaenopsis hybrid cultivar</i> | HQ439604   | Phyb_TCP2                                                                              | CIN     |
| <i>Phalaenopsis hybrid cultivar</i> | HQ439605   | Phyb_TCP3                                                                              | CIN     |
| <i>Phalaenopsis hybrid cultivar</i> | HQ439606   | Phyb_TCP4                                                                              | PCF     |
| <i>Phalaenopsis hybrid cultivar</i> | HQ439607   | Phyb_TCP5                                                                              | CIN     |
| <i>Phalaenopsis equestris</i>       | PEQU_03822 | TCP7_ARATH Transcription factor TCP7 OS=Arabidopsis thaliana GN=TCP7 PE=2 SV=1         | PCF     |
| <i>Phalaenopsis equestris</i>       | PEQU_15634 | PCF2_ORYSJ Transcription factor PCF2 OS=Oryza sativa subsp. japonica GN=PCF2 PE=1 SV=1 | PCF     |
| <i>Phalaenopsis equestris</i>       | PEQU_19398 | TCP15_ARATH Transcription factor TCP15 OS=Arabidopsis thaliana GN=TCP15 PE=2 SV=1      | PCF     |
| <i>Phalaenopsis equestris</i>       | PEQU_21454 | TCP2_ARATH Transcription factor TCP2 OS=Arabidopsis thaliana GN=TCP2 PE=2 SV=1         | CIN     |
| <i>Phalaenopsis equestris</i>       | PEQU_09751 | PCF2_ORYSJ Transcription factor PCF2 OS=Oryza sativa subsp. japonica GN=PCF2 PE=1 SV=1 | PCF     |
| <i>Phalaenopsis equestris</i>       | PEQU_14328 | TCP4_ARATH Transcription factor TCP4 OS=Arabidopsis thaliana GN=TCP4 PE=2 SV=1         | CIN     |
| <i>Phalaenopsis equestris</i>       | PEQU_19547 | TCP2_ARATH Transcription factor TCP2 OS=Arabidopsis thaliana GN=TCP2 PE=2 SV=1         | CIN     |
| <i>Phalaenopsis equestris</i>       | PEQU_21260 | TCP14_ARATH Transcription factor TCP14 OS=Arabidopsis thaliana GN=TCP14 PE=2 SV=1      | PCF     |
| <i>Phalaenopsis equestris</i>       | PEQU_25177 | TCP15_ARATH Transcription factor TCP15 OS=Arabidopsis thaliana GN=TCP15 PE=2 SV=1      | PCF     |
| <i>Phalaenopsis equestris</i>       | PEQU_06996 | TCP3_ARATH Transcription factor TCP3 OS=Arabidopsis thaliana GN=TCP3 PE=2 SV=1         | CIN     |
| <i>Phalaenopsis equestris</i>       | PEQU_08153 | TCP2_ARATH Transcription factor TCP2 OS=Arabidopsis thaliana GN=TCP2 PE=2 SV=1         | CIN     |
| <i>Phalaenopsis equestris</i>       | PEQU_40981 | TCP23_ARATH Transcription factor TCP23 OS=Arabidopsis thaliana GN=TCP23 PE=1 SV=1      | PCF     |
| <i>Phalaenopsis equestris</i>       | PEQU_28429 | TCP20_ARATH Transcription factor TCP20 OS=Arabidopsis thaliana GN=TCP20 PE=1 SV=1      | PCF     |
| <i>Phalaenopsis equestris</i>       | PEQU_39718 | TCP20_ARATH Transcription factor TCP20 OS=Arabidopsis thaliana GN=TCP20 PE=1 SV=1      | PCF     |
| <i>Phalaenopsis equestris</i>       | PEQU_06749 | TB1_MAIZE Transcription factor TEOSINTE BRANCHED 1 OS=Zea mays GN=TB1 PE=2 SV=2        | CYC/TB1 |
| <i>Phalaenopsis equestris</i>       | PEQU_06750 | TB1_MAIZE Transcription factor TEOSINTE BRANCHED 1 OS=Zea mays GN=TB1 PE=2 SV=2        | CYC/TB1 |
| <i>Phalaenopsis equestris</i>       | PEQU_11715 | TB1_MAIZE Transcription factor TEOSINTE BRANCHED 1 OS=Zea mays GN=TB1 PE=2 SV=2        | CYC/TB1 |

**Supplementary Table S2** The nucleotide sequence of the primers used.

| Name               | Target             | Forward                 | Reverse                                            | Application             |
|--------------------|--------------------|-------------------------|----------------------------------------------------|-------------------------|
| TB1_orchid_TCP     | CYC/TB1-like genes | AGRAARGAYMKRCAYARHAAGAT | YTTCTTCTCCAARGTYCTYTCYCT                           | PCR on genomic DNA      |
| comp8378_c0_seq1   | comp_8378          | CCAGCTATCTCAGGACGGTT    | ATAGCGGCTAGCAGGTTGAG                               | Real Time PCR           |
| comp8964_c0_seq1   | comp_8964          | CAGTCTCCGGGAGGTACG      | ACAAAGAGGCGAGGAGGTT                                | Real Time PCR           |
| comp21881_c0_seq1  | comp_21881         | GGATTCITGCAGCCCTAAC     | GAGTCACTCGTGCTCATCGT                               | Real Time PCR           |
| comp16641_c0_seq1  | comp_16641         | CATATGGGACAGGGAAGAGG    | GAGTCGACCCATCAGAATCA                               | Real Time PCR           |
| comp24776_c0_seq1  | comp_24776         | GGTCGAGCTAGGACTTTCA     | GTGCTGTTGATGGTGATGCT                               | Real Time PCR           |
| comp13386_c0_seq1  | comp_13386         | CCCTGTCAGTTTATGTCGAG    | AAGGTTCGAATCAGCAATCC                               | Real Time PCR           |
| comp12442_c0_seq1  | comp_12442         | CCGGAACATACTGCCATC      | GAAGTGGATGATCGGAACCT                               | Real Time PCR           |
| comp16313_c0_seq1  | comp_16313         | TTTCCATCATGCAAGACCAT    | AGGTGAATTGGACTGAAGGG                               | Real Time PCR           |
| comp5062_c0_seq1   | comp_5062          | GTCAGTCCAGGGATTGACT     | AGCAGTGCCAAAGAAGAAGG                               | Real Time PCR           |
| comp1326_c0_seq1   | comp_1326          | TGGTCCAGAACCAGTTGTGTC   | GCTGTTAGGTGCATCTGGTG                               | Real Time PCR           |
| comp21123_c0_seq1  | comp_21123         | CCCACAAGCTTCTCCAGTT     | AACAGCATGGCCGTGTAATA                               | Real Time PCR           |
| TB1_Oita_TCP       | OitaTB1            | CAAGTCTTCGATCTCCAGGAT   | GACGAGCTCTTTAATGGCTGATT                            | Real Time PCR           |
| REAL_5.8S_ITA      | 5.8S               | GGATACTTGGCTCTCGCAT     | GATGGTTCACGGGATTCTG                                | Real Time PCR           |
| Stem-Loop_miR319   | miR319             |                         | GTCGTATCCAGTGCAGGGTCCGAGGTATTCGCACTGGATACGACAGGGAG | Stem-Loop Real Time PCR |
| miR319F            | miR319             | GCGGCGGTTGGACTGAAGGGAG  |                                                    | Stem-Loop Real Time PCR |
| Stem-Loop_5.8S     | 5.8S               |                         | GTCGTATCCAGTGCAGGGTCCGAGGTATTCGCACTGGATACGACGATTCA | Stem-Loop Real Time PCR |
| REAL_5.8S_ITA_F    | 5.8S               | GGATACTTGGCTCTCGCAT     |                                                    | Stem-Loop Real Time PCR |
| Stem-Loop_Univ_Rev | Universal          |                         | GTGCAGGGTCCGAGGT                                   | Stem-Loop Real Time PCR |
| 1326_Rout          | comp_1326          |                         | GAAGCCAACCACATCGCCGGCGGCG                          | modified 5' RACE        |
| 1326_Rinn          | comp_1326          |                         | GCTGTTAGGTGCATCTGGTG                               | modified 5' RACE        |
| 5062_Rout          | comp_5062          |                         | CCTGCAGACGGCCATTGAAACCGCC                          | modified 5' RACE        |
| 5062_Rinn          | comp_5062          |                         | AGCAGTGCCAAAGAAGAAGG                               | modified 5' RACE        |
| 16313_Rout         | comp_16313         |                         | CCGGTGCATGTATGCCCTCATTACAG                         | modified 5' RACE        |
| 16313_Rinn         | comp_16313         |                         | CTGGTTCTCCAGCGAGCTTCCCGCTG                         | modified 5' RACE        |
